# Supplementary material
Source: publisher site journal article supplement (https://www.dovepress.com/article/271258)
Supplement: Supplementary file 1 [file get_supplementary_file.php]

## Appendix

Appendix Table 1. Stimulus intensities for each subject used in a comparison of subjective evaluations. rPMS: repetitive peripheral magnetic stimulation; TES: transcutaneous electrical current stimulation; S.D.: standard deviation; Ave: average.

| Integral value of the wrist angles (°s) |    | 20   |      | 40   |      | 60   |      | 80   |      | 100  |      | 120  |      | 140  |      |
|-----------------------------------------|----|------|------|------|------|------|------|------|------|------|------|------|------|------|------|
| Stimulus conditions (% mA)              |    | rPMS | TES  |
| Subjects No.                            | 1  | 70   | 11   | 70   | 13   | 70   | 13   | 70   | 14   | 70   | 14   | 70   | 15   | 70   | 15   |
|                                         | 2  | 60   | 13   | 70   | 14   | 70   | 14   | 70   | 15   | 70   | 15   | 70   | 16   | 70   | 16   |
|                                         | 3  | 60   | 12   | 60   | 13   | 60   | 13   | 70   | 14   | 70   | 14   | 70   | 14   | 80   | 15   |
|                                         | 4  | 60   | 14   | 60   | 14   | 60   | 14   | 60   | 15   | 70   | 15   | 70   | 15   | 70   | 15   |
|                                         | 5  | 80   | 18   | 80   | 18   | 90   | 19   | 90   | 19   | 90   | 19   | 90   | 20   | 100  | 20   |
|                                         | 6  | 50   | 11   | 60   | 11   | 60   | 12   | 60   | 12   | 60   | 12   | 70   | 13   | 70   | 13   |
|                                         | 7  | 40   | 13   | 40   | 13   | 50   | 13   | 50   | 14   | 50   | 14   | 60   | 14   | 70   | 14   |
|                                         | 8  | 60   | 14   | 60   | 15   | 70   | 15   | 80   | 16   | 80   | 16   | 90   | 17   | 100  | 18   |
|                                         | 9  | 40   | 14   | 40   | 15   | 40   | 15   | 40   | 15   | 40   | 15   | 50   | 16   | 50   | 16   |
|                                         | 10 | 50   | 12   | 60   | 13   | 60   | 13   | 60   | 14   | 70   | 14   | 70   | 14   | 70   | 15   |
|                                         | 11 | 40   | 13   | 50   | 14   | 50   | 15   | 50   | 15   | 50   | 15   | 50   | 16   | 70   | 17   |
|                                         | 12 | 70   | 19   | 70   | 19   | 70   | 19   | 80   | 19   | 80   | 20   | 80   | 20   | 80   | 20   |
| Ave.                                    |    | 56.7 | 13.7 | 60   | 14.3 | 62.5 | 14.6 | 65   | 15.2 | 66.7 | 15.3 | 70   | 15.8 | 75   | 16.2 |
| S.D.                                    |    | 13   | 2.5  | 12.1 | 2.2  | 12.9 | 2.3  | 14.5 | 2.2  | 14.4 | 2.2  | 12.8 | 2.2  | 13.8 | 2.2  |

Appendix Figure 1

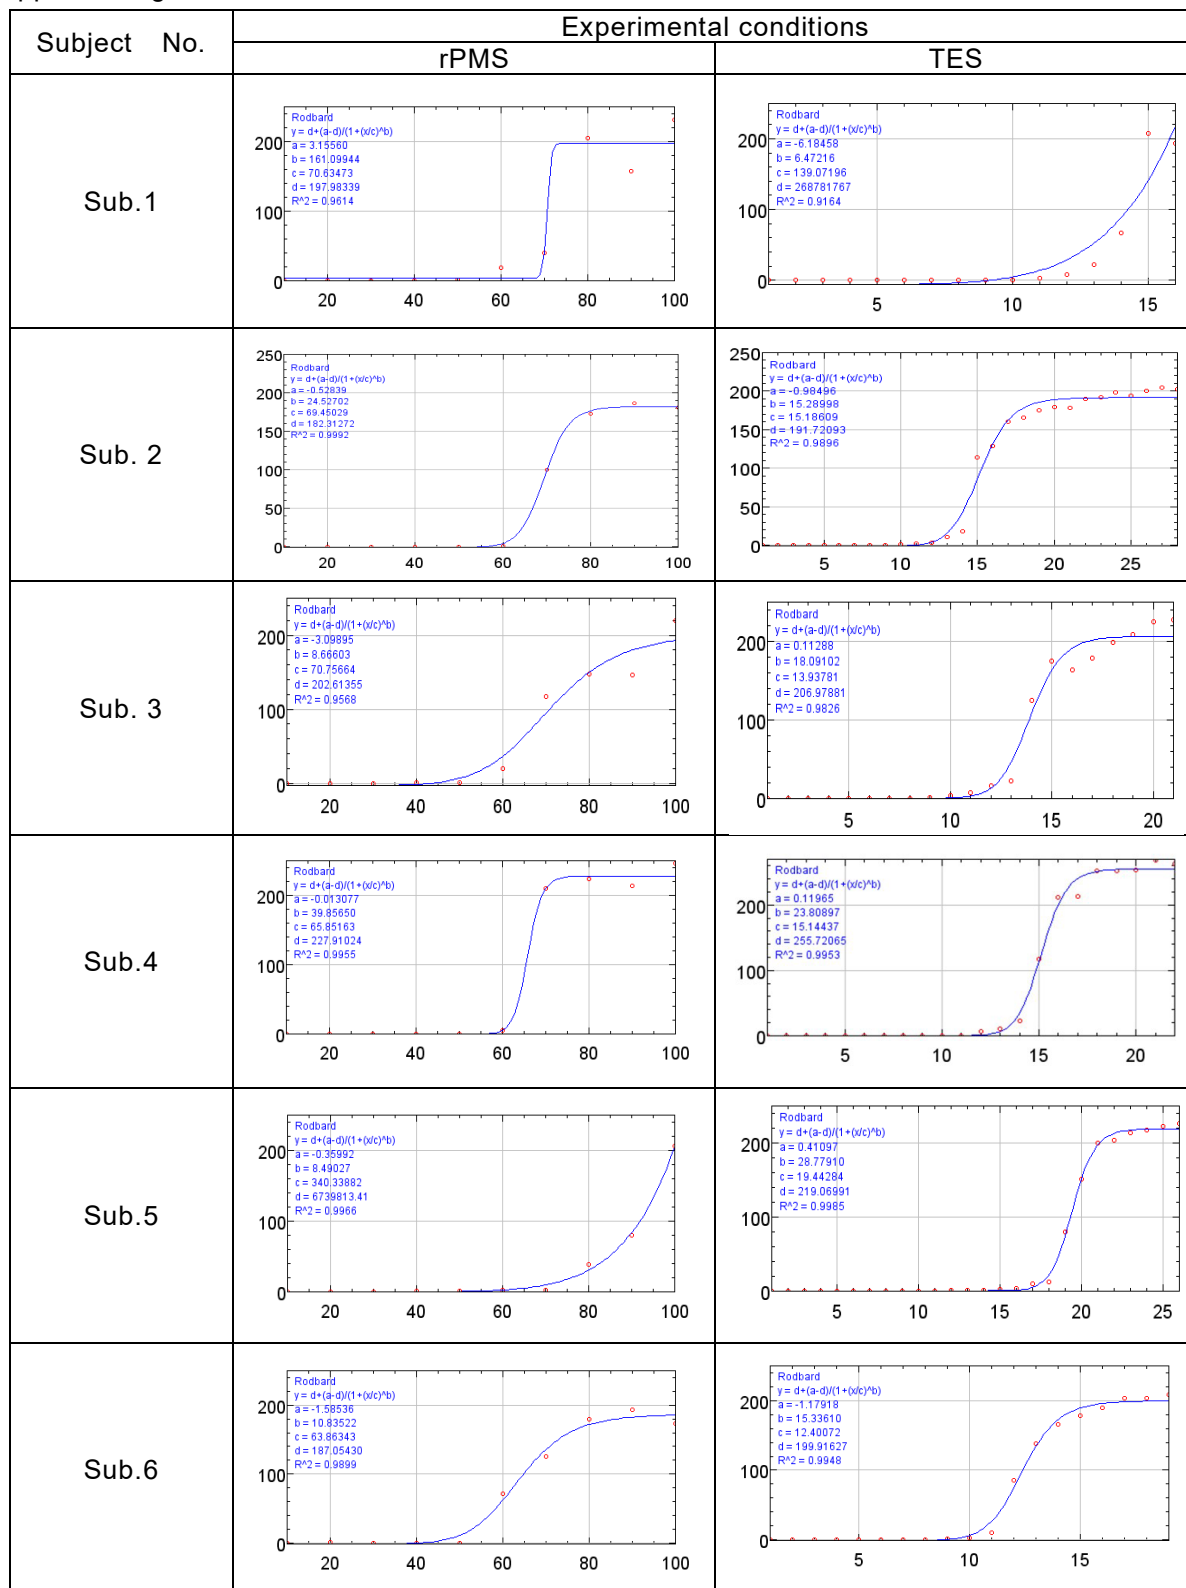

Fig.1a Regression curve of each subject using sigmoid function. rPMS: repetitive peripheral magnetic stimulation, TES: transcutaneous electrical current stimulation. X-axis shows stimulus intensity, which the unit of rPMS is “%” and it of TES is “mA”. Y-axis shows integral value of wrist movement, which the units of both conditions is “° · s”.

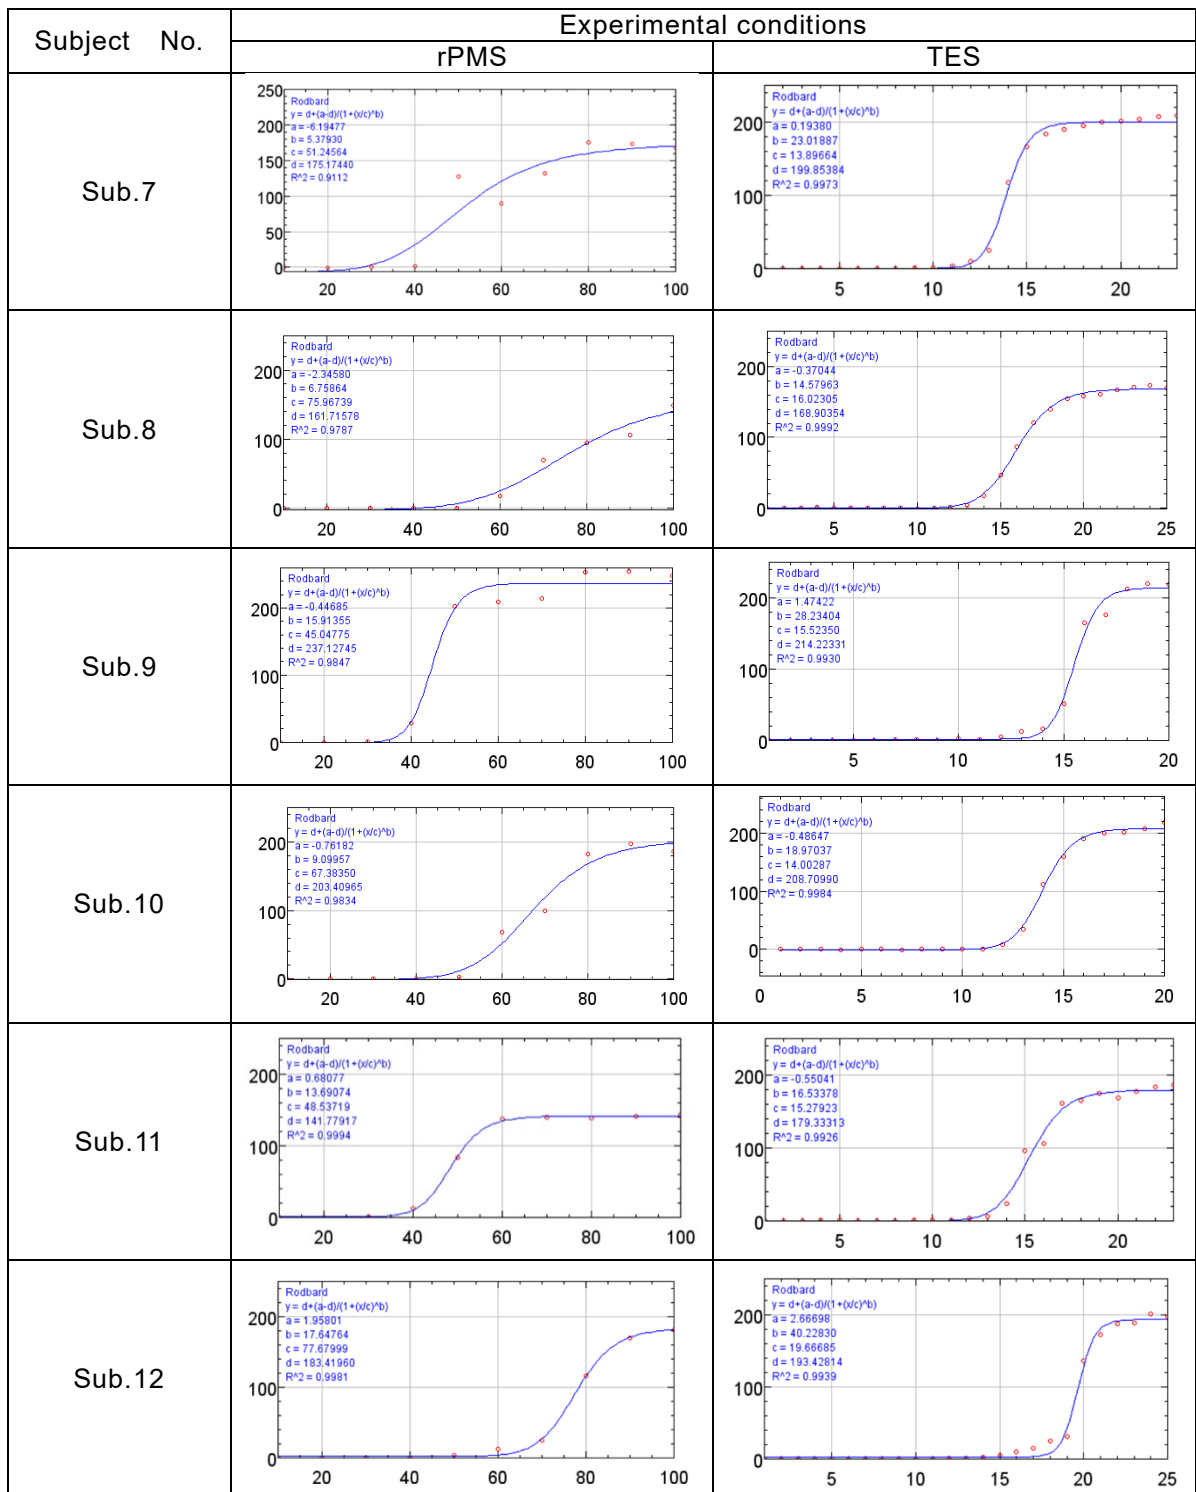

Fig.1b Regression curve of each subject using sigmoid function. rPMS: repetitive peripheral magnetic stimulation, TES: transcutaneous electrical current stimulation. X-axis shows stimulus intensity, which the unit of rPMS is % and it of TES is mA. Y-axis shows integral value of wrist movement, which the units of both conditions is  $^{\circ} \cdot s$ .
